# Supplementary material for: Macroscale assembly of peptide nanotubes
Source: Royal Society of Chemistry journal article supplement (doi:10.1039/b701029j), 2007-01-01
Supplement: b701029j.pdf [file b701029j.pdf]

*Supporting information*

**Macroscale Assembly of Peptide Nanotubes**

*Kun Lu, Liang Guo, Anil K. Mehta, W. Seth Childers, Steven N. Dublin, S. Skanthakumar, Vincent P. Conticello, P. Thiagarajan, Robert P. Apkarian, and David G. Lynn\**

**(1) X-ray Powder Diffraction**

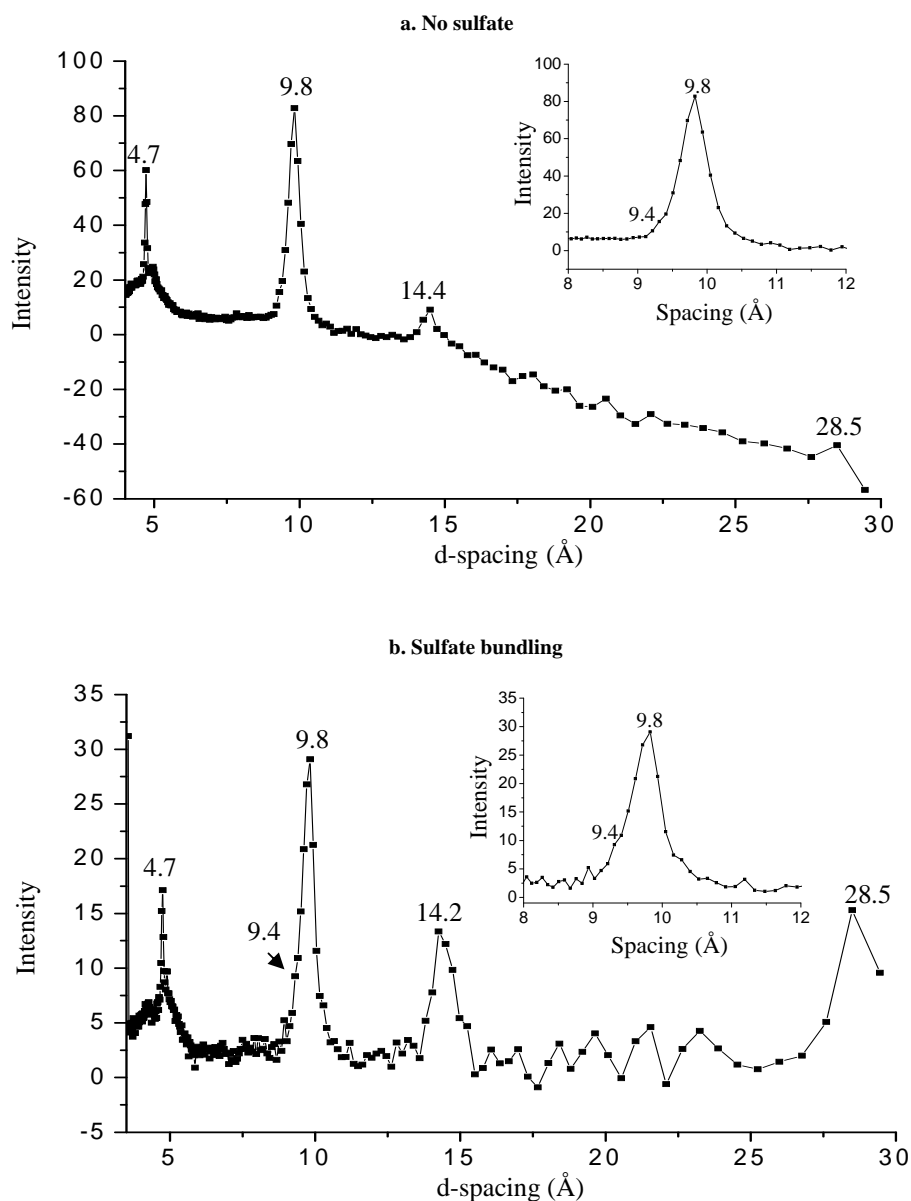

**Fig. S1.** Comparison of X-ray diffraction patterns of nanotubes before (a) and after (b) sulfate bundling. The typical cross- $\beta$  conformation with  $\sim 5\text{\AA}$  and  $\sim 10\text{\AA}$  reflections are conserved. The presence of  $9.4\text{\AA}$  reflection suggests the antiparallel  $\beta$ -sheet structure.

**(2) Comparison of derived structure factors for nanotubes in salt solutions using form factors for a core-shell cylinder and a rectangular cross-section cylinder**

The diameter of the nanotubes prior to bundling,  $52\text{ nm}$ , and the repeat distance of  $45.6\text{ nm}$  based on the first order peak at  $Q \sim 0.0138\text{ \AA}^{-1}$  were used to determine the cross-section of the nanotubes. The tubes inside the bundles do not have a perfect square cross-section. Rather it fits better with a structure that is between a circle and a square, having square sides of length ( $l$ ) and round edges of radius ( $r$ ):

$$2r + l = 45.6 \quad (1)$$

$$2r + 4l = 52\text{ nm}$$

Solving these simultaneous equations gives  $r = 11.09\text{ nm}$  and  $l = 23.42\text{ nm}$

We compared the extracted structure factors using the form factors for core-shell cylinders with a circular ( $r=26$  nm) and a square cross-section with  $a = 41$  nm (Fig. 2S). In both cases, the peak positions are similar and consistent with a lamellar order.

Core-shell circular cylinder form factor:

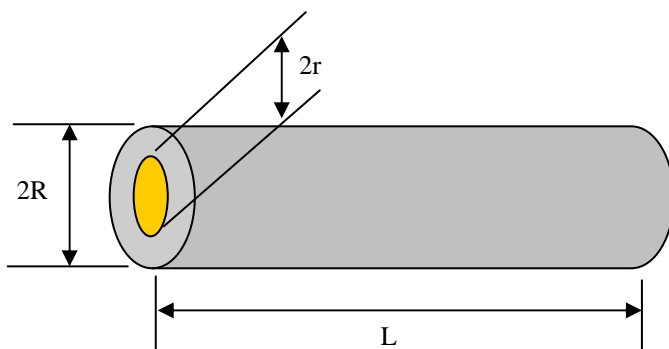

Eq. 1

$$F(q) = \frac{1}{\mathcal{G}} \int_0^{\pi/2} \left[ \left( (\rho_R - \rho_{\text{solvent}}) R^2 \frac{2B_1(qR \sin \alpha)}{qR \sin \alpha} + (\rho_r - \rho_R) r^2 \frac{2B_1(qr \sin \alpha)}{qr \sin \alpha} \right) \frac{\sin((qL \cos \alpha)/2)}{(qL \cos \alpha)/2} \right]^2 \sin \alpha d\alpha$$

$$\mathcal{G} = \left[ \left( (\rho_R - \rho_{\text{solvent}}) R^2 + (\rho_r - \rho_R) r^2 \right) \right]^2$$

Generalized core-shell square cylinder form factor:

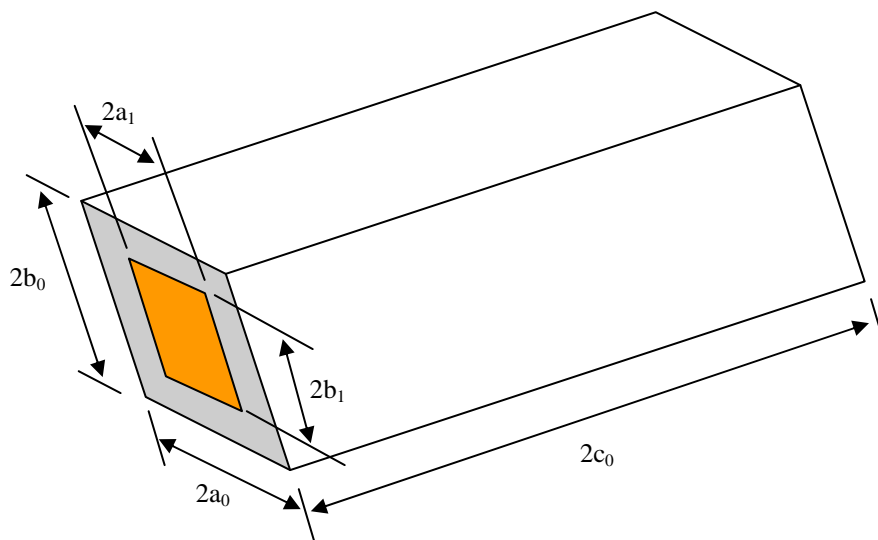

Eq. 2

$$F(q) = \frac{2}{\pi \psi} \int_0^{\pi/2} \int_0^{\pi/2} \left( (\rho_0 - \rho_{\text{solvent}}) a_0 b_0 \phi(q, a_0, b_0, c_0, \alpha, \beta) + (\rho_1 - \rho_0) a_1 b_1 \phi(q, a_1, b_1, c_1, \alpha, \beta) \right)^2 \sin \alpha d\alpha d\beta$$

$$\psi = \left( (\rho_0 - \rho_{\text{solvent}}) a_0 b_0 + (\rho_1 - \rho_0) a_1 b_1 \right)^2$$

$$\phi(q, a, b, c, \alpha, \beta) = \frac{\sin(qa \sin \alpha \cos \beta)}{qa \sin \alpha \cos \beta} \frac{\sin(qb \sin \alpha \sin \beta)}{qb \sin \alpha \sin \beta} \frac{\sin(qc \cos \alpha)}{qc \cos \alpha}$$

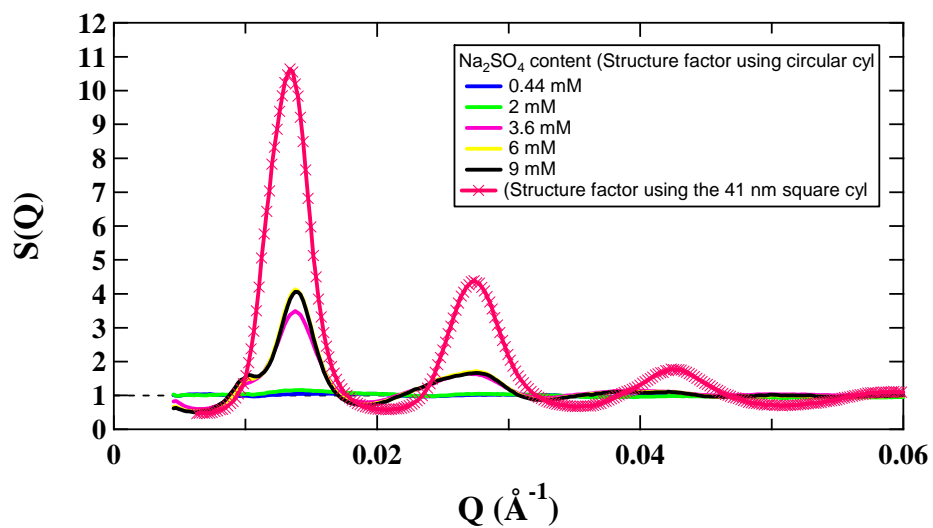

**Fig. S2.** Structure factor evaluations for different sulfate titrations using the form factors for core-shell cylinder with a circular cross-section ( $r=26$  nm) and a square cross-section with a 41 nm width for the 9 mM sulfate titration. The peak intensity (red curve with markers for the 9 mM sulfate) is more pronounced, but the peak positions still correspond to the lamellar
